# Supplementary material for: Resistance profiles of microbial communities in maize rhizospheres to the introduction of exogenous antibiotics to agricultural systems with a high arsenic geological background
Source: Royal Society of Chemistry journal article supplement (doi:10.1039/d3em00149k), 2023-01-01
Supplement: d3em00149k1.pdf [file d3em00149k1.pdf]

## Supplementary Material

**Resistance profiles of microbial communities in maize rhizospheres  
to the introduction of exogenous antibiotics to agricultural systems  
with high arsenical geological backgrounds**

Moxin Xu<sup>1,2&</sup>, Jinping Jiang<sup>1,2&</sup>, Yongshan Chen<sup>3,4\*</sup>, Ying Feng<sup>3,4</sup>, Xiaofeng Li<sup>3</sup>, Lili Ye<sup>1</sup>

<sup>1</sup> College of Environmental Science and Engineering, Guilin University of Technology, Guilin 541006, PRChina;

<sup>2</sup> Guangxi Collaborative Innovation Center for Water Pollution Control and Water Safety in Karst Area, Guilin University of Technology, Guilin, Guangxi 541004, PR China

<sup>3</sup> School of Resources and Environmental Science, Quanzhou Normal University, Quanzhou 362000, PR China

<sup>4</sup> Fujian Province Key Laboratory for the Rural Environmental Remediation and Waste Recycling, Quanzhou362000, PR Chin;

& These authors contributed to the work equally and should be regarded as co-first authors.

\* Correspondence: [yshchen421@163.com](mailto:yshchen421@163.com) (Chen Y.S.)

**Table S1:** Primers and standard curves for the qPCR process. Standard curves of qPCR assays obtained from 10-fold serially diluted plasmids which carrying the target sequence.

| Target       | Primer or Probe | Sequence (5' → 3')      | Annealing Temp (°C) | Amplicon Size (bp) | Standard Curves     | R <sup>2</sup> |
|--------------|-----------------|-------------------------|---------------------|--------------------|---------------------|----------------|
| <i>sul2</i>  | <i>sul2</i> -F  | TCCGGTGGAGGCCGGTATCTGG  | 60.0                | 190                | $y=-3.8834x+38.366$ | 0.9991         |
|              | <i>sul2</i> -R  | CGGGAATGCCATCTGCCTTGAG  |                     |                    |                     |                |
| <i>tetC</i>  | <i>tetC</i> -F  | GCGGGATATCGTCCATTCCG    | 60.0                | 207                | $y=-3.7367x+35.817$ | 0.9998         |
|              | <i>tetC</i> -R  | GCGTAGAGGATCCACAGGACG   |                     |                    |                     |                |
| <i>tetG</i>  | <i>tetG</i> -F  | CGTTCTTCTGGCTTTTGC      | 60.0                | 132                | $y=-3.8788x+37.426$ | 0.999          |
|              | <i>tetG</i> -R  | GCCCCTTGCTTGTTACTG      |                     |                    |                     |                |
| <i>tetM</i>  | <i>tetM</i> -F  | GAGCAAACCTCAACAAAG      | 60.0                | 154                | $y=-3.562x+35.52$   | 0.9988         |
|              | <i>tetM</i> -R  | CAGCAGAGCACAAAGTCAC     |                     |                    |                     |                |
| <i>tetW</i>  | <i>tetW</i> -F  | CTTATGGGCGGTGTCTGT      | 60.0                | 176                | $y=-4.0929x+39.437$ | 0.9977         |
|              | <i>tetW</i> -R  | GCGTTTTCAAGGTGGAGT      |                     |                    |                     |                |
| <i>tetX</i>  | <i>tetX</i> -F  | TGACTTAGCCTTACCAAT      | 60.0                | 256                | $y=-4.024x+38.926$  | 0.9994         |
|              | <i>tetX</i> -R  | AAGAATAACCAAATCTGC      |                     |                    |                     |                |
| <i>aioA</i>  | <i>aioA</i> -F  | CCACTTCTGCATCGTGGG      | 60.0                | 1114               | $y=-3.31x+39.24$    | 0.9956         |
|              | <i>aioA</i> -R  | TGTCGTTGCCCCAGATGA      |                     |                    |                     |                |
| <i>arsM</i>  | <i>arsM</i> -F  | TCYCTCGGCTGCGGCAAYCCVAC | 60.0                | 347                | $y=-3.33x+37.50$    | 0.9991         |
|              | <i>arsM</i> -R  | CGWCCGCCWGGCTTWAGYACCCG |                     |                    |                     |                |
| 16S rRNA     | 16s-F           | GGGTTGCGCTCGTTGC        | 60.0                | 60                 | $y=-3.1251x+32.581$ | 0.9978         |
|              | 16s-R           | ATGGYTGTCTGTCAGCTCGTG   |                     |                    |                     |                |
| <i>intI1</i> | <i>intI1</i> -F | GGCTTCGTGATGCCTGCTT     | 60.0                | 146                | $y=-3.4363x+33.588$ | 0.9986         |
|              | <i>intI1</i> -R | CATTCTGGCCGTGGTTCT      |                     |                    |                     |                |

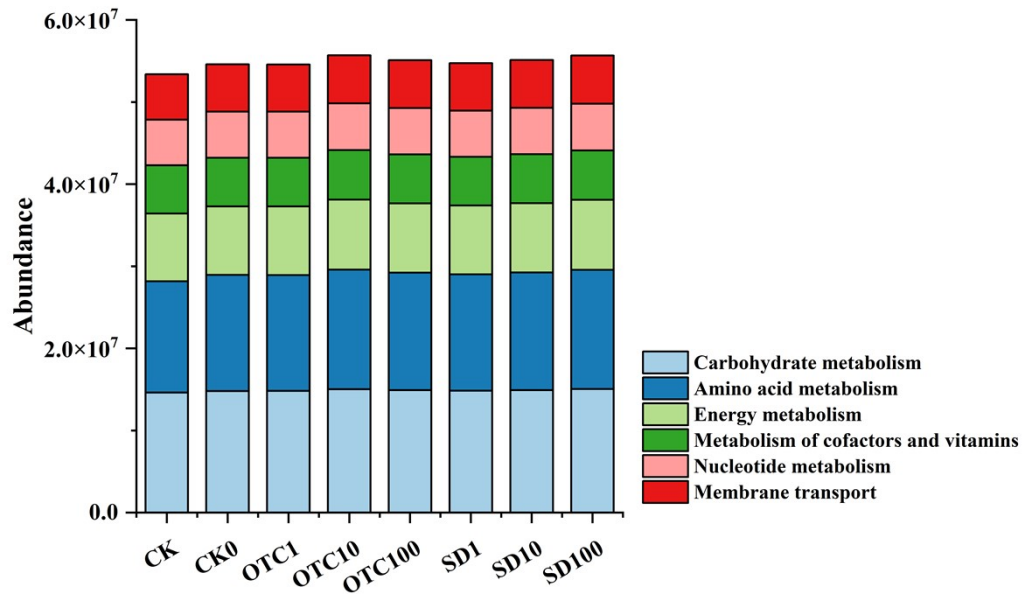

Figure S1. the functional composition at level 2 of Kyoto Encyclopedia of Genes and Genomes (KEGG) from all microcosms in soils of antibiotics exposure. CK0, without the application of manure and antibiotics; CK, manure with no antibiotics; OTC1, manure with OTC (1mg/kg); OTC10, manure with OTC (10mg/kg); OTC100, manure with OTC (100mg/kg); SD1, manure with SD (1mg/kg); SD10, manure with SD (10mg/kg); SD100, manure with SD (100mg/kg).

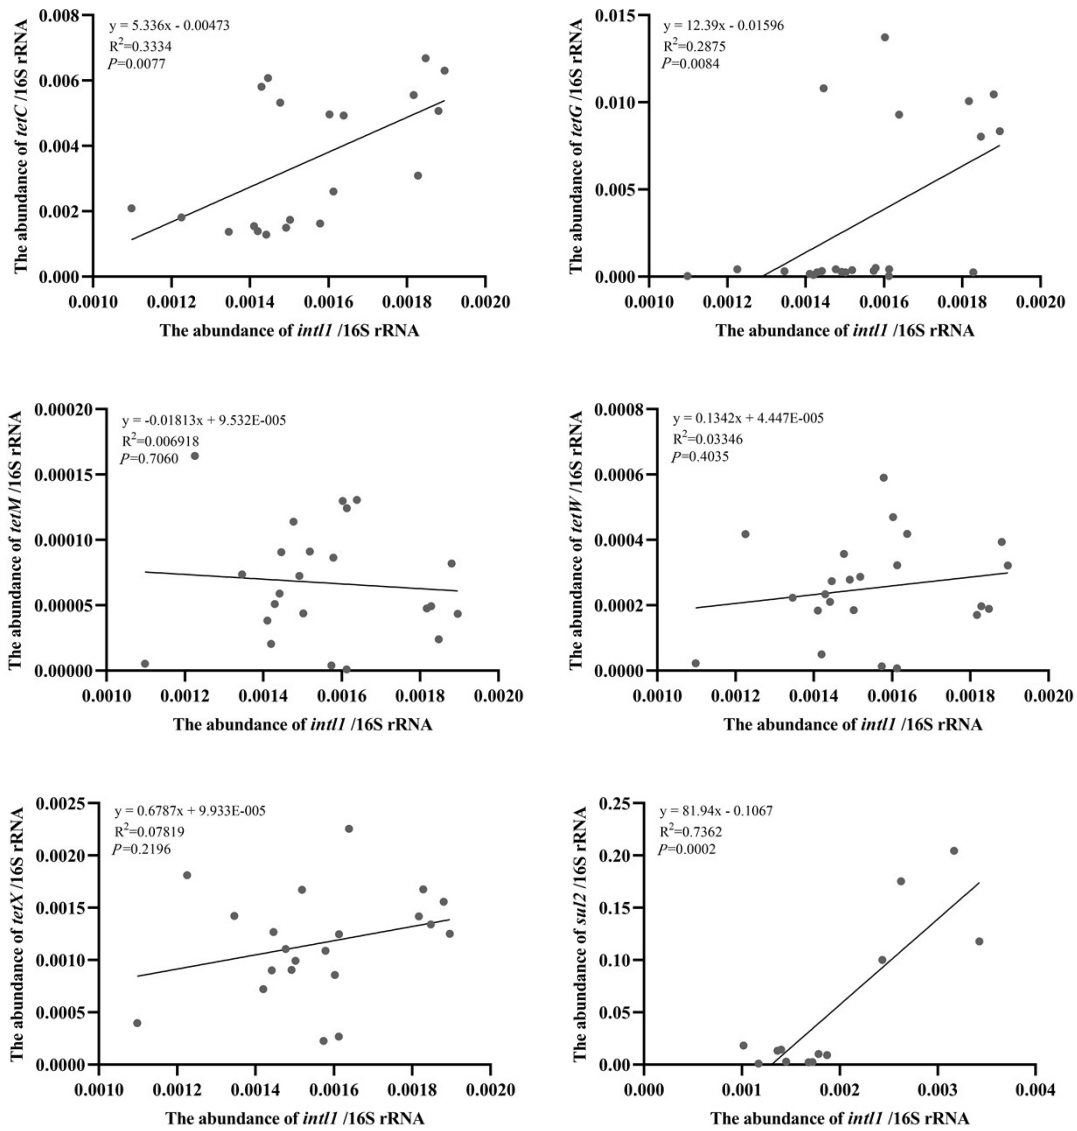

Figure S2 relationship between ARGs and *int1*. CK0, without the application of manure and antibiotics; CK, manure with no antibiotics; OTC1, manure with OTC (1mg/kg); OTC10, manure with OTC (10mg/kg); OTC100, manure with OTC (100mg/kg); SD1, manure with SD (1mg/kg); SD10, manure with SD (10mg/kg); SD100, manure with SD (100mg/kg).

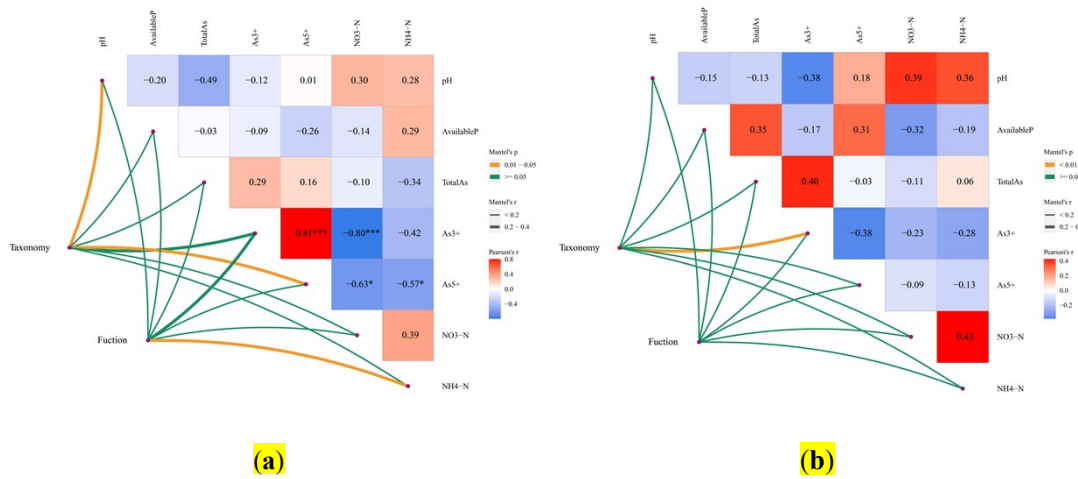

Figure S3. Environmental drivers of microbial community composition in antibiotic treatment groups: (a for OTC groups, b for SD groups) pairwise comparisons of environmental factors were shown, with color gradients representing Spearman's correlation coefficients. Taxonomic (based on genus-level bacteria) and functional (based on ARGs, AMGs, *intl1*) community composition was related to each environmental factor by Mantel tests. Edge width denotes the Mantel's  $r$  statistic for the corresponding distance correlations, and edge color represents the statistical significance.
